# Supplementary material for: Impact of dissolved carbon dioxide concentration on the process parameters during its conversion to acetate through microbial electrosynthesis
Source: Royal Society of Chemistry journal article supplement (doi:10.1039/c7re00220c), 2018-01-01
Supplement: c7re00220c1.pdf [file c7re00220c1.pdf]

**Supplementary Information**

**Table 1: Consolidated table presenting the overall results from experimental variations performed from bioelectrochemical reduction of bicarbonates to acetate production.**

| <i>Substrate concentration (g HCO<sub>3</sub><sup>-</sup>/L)</i> | <i>1.0</i> | <i>1.5</i> | <i>2.0</i> | <i>2.5</i> | <i>4.0</i> | <i>8.0<sup>€</sup></i> | <i>12.0<sup>€</sup></i> | <i>15.0<sup>¥</sup></i> |
|------------------------------------------------------------------|------------|------------|------------|------------|------------|------------------------|-------------------------|-------------------------|
| Maximum C-conversion efficiency (%)                              | 77.23      | 78.61      | 91.33      | 93.71      | 73.01      | 61.67                  | 45.30                   | 41.08                   |
| Average C-conversion efficiency (%)                              | 74.01      | 74.92      | 81.99      | 84.01      | 67.04      | 52.37                  | 38.58                   | 41.08                   |
| Maximum acetate production per cycle (mg L <sup>-1</sup> )       | 251        | 280        | 503        | 776        | 969        | 379                    | 241                     | 106                     |
| Maximum acetate concentration (g L <sup>-1</sup> ) *             | 1.24       | 1.45       | 2.14       | 3.58       | 4.97       | 0.60                   | 0.34                    | 0.11                    |
| Acetate production rate (mg L <sup>-1</sup> d <sup>-1</sup> ) #  | 35.46      | 41.51      | 61.31      | 102.40     | 142.22     | 60.50                  | 33.50                   | 21.20                   |
| Current density (mA m <sup>-2</sup> ) \$                         | -42.00     | -63.00     | -84.00     | -101.20    | -69.10     | -33.80                 | -24.60                  | -22.30                  |
| Average coulombic efficiency (CE, %)                             | 45.55      | 39.56      | 40.37      | 56.25      | 139.41     | 112.24                 | 79.96                   | 47.98                   |

\* - Total acetate production from 7 cycles of operation (from 1.0 to 4.0 g HCO<sub>3</sub><sup>-</sup>/L); from 2 cycles for 8 and 12 g HCO<sub>3</sub><sup>-</sup>/L and 1 cycle for 15 g HCO<sub>3</sub><sup>-</sup>/L.

& - Based on the maximum acetate concentration

# - Average calculated from 7 cycles (from 1.0 to 4.0 g HCO<sub>3</sub><sup>-</sup>/L); from 2 cycles for 8 and 12 g HCO<sub>3</sub><sup>-</sup>/L and 1 cycle for 15 g HCO<sub>3</sub><sup>-</sup>/L.

\$ - Calculated based on the projected surface area of electrode

€ Operated only for 2 cycles and the presented results were average of 2 cycles

¥ Operated only for 1 cycle

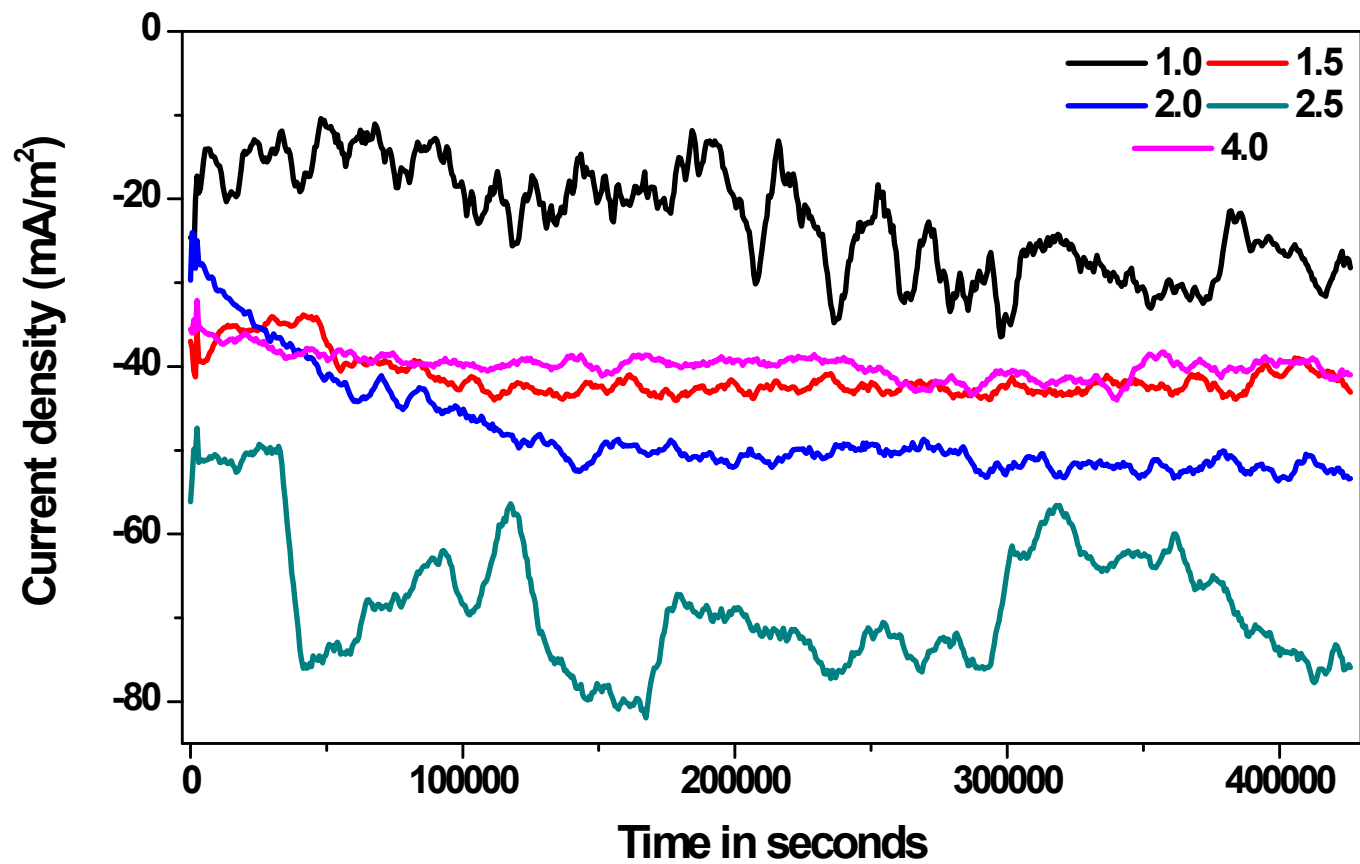

**Figure 1:** Current density vs time recorded through chronoamperometry with 600 seconds as the time interval for each record with 5 bicarbonate variations studied. All the values from the second cycle of each bicarbonate concentration studied.
